# Supplementary material for: Interaction of nano-quantum dots (CdSe@ZnS) and extracellular proteins in activated sludge revealed by bio-nano science
Source: Royal Society of Chemistry journal article supplement (doi:10.1039/d0en00392a), 2020-01-01
Supplement: d0en00392a2.xlsx [file d0en00392a2.xlsx]

## Sheet: Sheet1
id	Majority protein IDs	Number of proteins	Peptides	Unique peptides	Mol. weight [kDa]	Score	Intensity
80	Cup_Q1LEF4	1	1	1	48.66	5.7836	1505400000
135	SMS_WP_025878656.1	1	1	1	109.58	6.9294	655800000
10	ATN_A9CJT0	1	1	1	16.826	5.8818	291220000
108	PD_M4WQJ5	1	1	1	32.164	5.818	256280000
6	VF_WP_028740339.1;841_Q1MLG0	2	1	1	40.458	5.9754	99570000
19	BXL_Q13TS0	1	1	1	22.412	5.7282	91587000
12	ATN_A9CLS4	1	1	1	28.746	5.8252	62255000
20	BXL_Q13V90	1	1	1	38.711	33.416	62027000
88	LT2_P0A1D3;K12_P0A6F5	2	2	2	57.285	38.617	45691000
5	841_Q1MHB5	1	1	1	65.504	5.8046	44407000
67	CRH_XP_001691303.1	1	1	1	26.699	5.7704	35388000
133	SMS_WP_025873794.1	1	1	1	42.429	6.5125	32757000
109	PD_M4WST4	1	1	1	29.549	5.806	31244000
111	PD_M4WYI9	1	1	1	58.258	5.9353	29497000
76	CRH_XP_001702228.1;CRH_XP_001700723.1	2	1	1	28.976	5.7388	27166000
13	ATN_Q7CZM5	1	1	1	77.4	5.7547	26121000
9	ATN_A9CHG4	1	1	1	22.64	5.7262	18282000
22	BXL_Q13ZW7	1	1	1	57.018	13.865	15256000
121	Pfl_2617956293	1	3	3	43.563	28.948	13741000
91	K12_Q47718	1	1	1	22.265	5.9091	12606000
1	841_Q1M9K9	1	1	1	49.715	5.8573	12349000
21	BXL_Q13XA8	1	1	1	132.56	5.728	10249000
126	Pfl_2617958321	1	1	1	6.1481	5.8311	8751800
122	Pfl_2617956294	1	2	2	77.156	21.595	8644700
98	Nu1_A0A0S3AFC8;Nm1_Q2YA36;Ne1_Q50925	3	1	1	64.098	6.399	8056100
64	CRH_XP_001698954.1;CRH_XP_001697820.1;CRH_XP_001700454.1;CRH_XP_001700425.1;CRH_XP_001700409.1;CRH_XP_001700399.1;CRH_XP_001693466.1;CRH_XP_001691688.1;CRH_XP_001691545.1;CRH_XP_001691528.1;CRH_XP_001690722.1;CRH_XP_001690682.1;CRH_XP_001690672.1;CRH_XP_001702225.1;CRH_XP_001696521.1;CRH_XP_001696461.1;CRH_XP_001696453.1;CRH_XP_001696444.1;CRH_XP_001691003.1;CRH_XP_001690995.1;CRH_XP_001690827.1;…	30	1	1	7.5227	7.9658	7714200
82	Cup_Q1LL77	1	1	1	37.32	5.7294	7551900
11	ATN_A9CKA7	1	1	1	36.178	7.3487	7317100
134	SMS_WP_025876748.1	1	1	1	79.335	5.7268	7192100
24	BXL_Q145L4	1	1	1	86.738	5.7404	7055900
4	841_Q1MG24	1	1	1	14.82	5.7788	6696200
129	Pfl_2617958499	1	1	1	83.08	5.9891	6545900
56	CRH_XP_001699660.1;CRAP_PRDX1_HUMAN	2	1	1	21.642	5.7447	6501500
112	PD_M4XI26	1	1	1	28.511	6.489	6437000
128	Pfl_2617958446	1	1	1	7.7266	6.6099	6344500
73	CRH_XP_001697687.1	1	1	1	14.77	5.8437	5873200
99	Nu1_A0A0S3AFA8;Ne1_Q82SI5	2	1	1	73.159	5.8548	5750300
117	Pfl_2617956011	1	1	1	74.974	8.8103	5321700
74	CRH_XP_001697735.1	1	1	1	27.206	5.8064	4818700
23	BXL_Q140J2	1	1	1	37.823	5.8866	4264900
113	Pfl_2617955329	1	1	1	34.59	21.633	4238800
124	Pfl_2617956942	1	2	2	49.487	12.675	3947800
97	LT2_Q8ZKB5	1	1	1	19.929	5.7315	3910800
8	ATN_A9CFT2	1	1	1	63.973	5.7414	3907300
125	Pfl_2617957463	1	2	2	99.477	22.662	3649800
110	PD_M4WUS6	1	1	1	40.682	5.7697	3462800
103	Nu1_A0A0S3AHY6	1	1	1	67.088	5.7585	3462800
85	DVH_Q72DJ7	1	1	1	42.768	5.7409	3228500
116	Pfl_2617955801	1	1	1	140.67	8.8834	3054000
83	Pfl_2617960996;CV_peg.2820;CV_peg.1513	3	1	1	7.6825	10.381	2879000
119	Pfl_2617956265	1	1	1	36.645	5.9401	2395000
96	LT2_P41783	1	1	1	44.459	5.7888	2337400
104	NV_AIC16135.1	1	1	1	18.881	5.73	2251200
101	Ne1_Q82W75	1	1	1	37.57	5.7473	2180700
130	Pfl_2617959021	1	1	1	42.957	5.9932	2170300
100	Ne1_Q82SV8	1	1	1	13.388	5.7886	1994000
93	Pfl_2617955718;PD_M4XL15;KF7_ELS28298.1;KF7_ELS26220.1	4	1	1	54.93	5.8443	1961200
92	Pfl_2617958414;PD_M4WTE8;KF7_ELS25588.1	3	1	1	27.109	9.4065	1954100
90	K12_P41441	1	1	1	44.339	5.8517	1883000
0	VF_WP_028741723.1;841_Q1M6E3	2	1	1	77.349	5.7273	1633000
136	VF_WP_032993024.1	1	1	1	48.502	5.9058	1605000
78	CRH_XP_001702033.1	1	1	1	111.31	6.7902	1604600
87	HB2_Q72KQ4	1	1	1	25.157	5.7305	1557000
118	Pfl_2617956016	1	1	1	90.301	5.7396	1535700
18	Pfl_2617956279;PD_M4WRV0;KF7_ELS24513.1;BXL_Q13TI2	4	1	1	20.503	21.631	1517900
102	Nm1_Q2YAR1	1	1	1	105.52	5.7257	1449100
71	CRH_XP_001693949.1	1	1	1	29.997	5.8242	1355000
86	F2_P00585	1	1	1	60.837	6.2299	1342900
15	BS_O34673	1	1	1	54.872	5.7254	1245200
114	Pfl_2617955429	1	1	1	8.6444	5.942	1238500
2	VF_WP_011654000.1;841_Q1MA99	2	1	1	57.162	5.9273	1219800
127	Pfl_2617958415	1	1	1	30.433	9.7202	1166100
3	VF_WP_011652918.1;841_Q1MDQ1	2	1	1	38.662	6.0503	1154900
69	CRH_XP_001698159.1;CRH_XP_001692911.1	2	1	1	45.637	5.7813	1133600
14	BS_O06714	1	1	1	128.92	5.8827	995580
81	Cup_Q1LJ50	1	1	1	21.096	5.763	985990
77	CRH_XP_001702017.1	1	1	1	73.488	5.9334	953060
7	Am2_A0A0E0YD80	1	1	1	70.876	5.7562	911990
16	BS_P71025	1	1	1	32.667	5.7796	630610
120	Pfl_2617956276	1	1	1	19.197	6.1818	606780
94	KF7_ELS29568.1	1	1	1	75.728	6.6416	412390
131	Pfl_2617960672	1	1	1	7.4046	5.7249	0
123	Pfl_2617956298	1	1	1	154.55	6.0519	0
115	Pfl_2617955649	1	1	1	37.866	5.8748	0
95	LT2_P0A267	1	1	1	54.815	5.874	0
89	K12_P0A705	1	1	1	97.349	5.725	0
79	CRH_XP_001702568.1	1	1	1	157.43	5.7249	0
75	CRH_XP_001698501.1	1	1	1	2056.4	5.7249	0
63	CRH_XP_001697821.1;CRH_XP_001698955.1;CRH_XP_001690669.1;CRH_XP_001703063.1;CRH_XP_001702964.1;CRH_XP_001700455.1;CRH_XP_001700424.1;CRH_XP_001700408.1;CRH_XP_001700398.1;CRH_XP_001698253.1;CRH_XP_001698167.1;CRH_XP_001696553.1;CRH_XP_001696524.1;CRH_XP_001696520.1;CRH_XP_001696488.1;CRH_XP_001696459.1;CRH_XP_001696452.1;CRH_XP_001696285.1;CRH_XP_001696279.1;CRH_XP_001696277.1;CRH_XP_001696262.1;…	33	1	1	10.548	6.3231	0
72	CRH_XP_001695532.1	1	1	1	42.673	6.0591	0
70	CRH_XP_001693149.1	1	1	1	181.32	5.7249	0
68	CRH_XP_001692777.1	1	1	1	32.623	5.7249	0
66	CRH_XP_001691280.1	1	1	1	150.27	5.7249	0
65	CRH_XP_001691276.1	1	1	1	80.388	5.7249	0
62	CRH_XP_001690111.1	1	1	1	92.807	5.7249	0
61	CRH_XP_001689623.1	1	1	1	172.96	5.7249	0
17	BXL_Q13QW0	1	1	1	61.941	11.323	0
